# Supplementary material for: Chinese Herbal Extractions for Relieving Radiation Induced Lung Injury: A Systematic Review and Meta‐Analysis
Source: Hindawi journal article supplement (doi:10.1155/2017/2141645), 2017-01-01
Supplement: f1 [file 2141645.f1.zip]

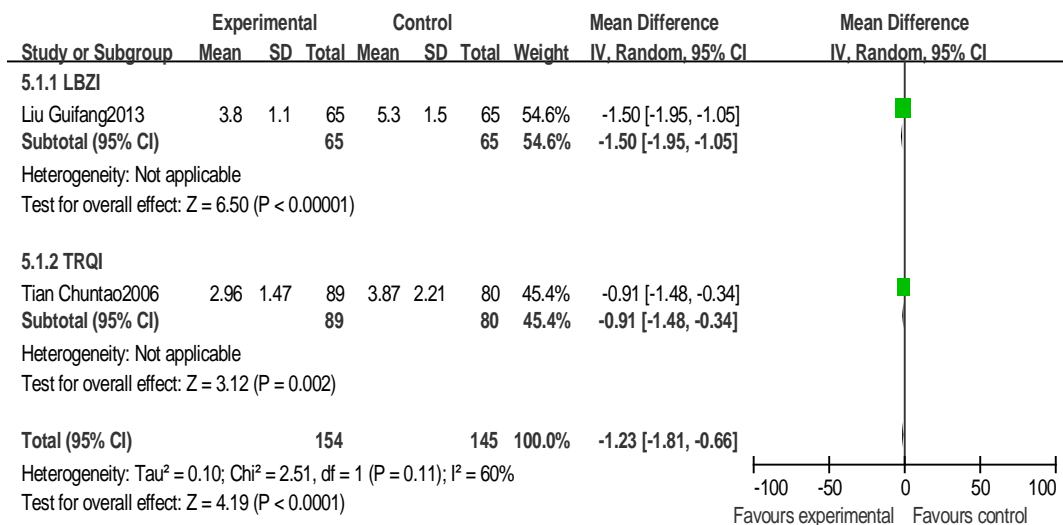

(a)

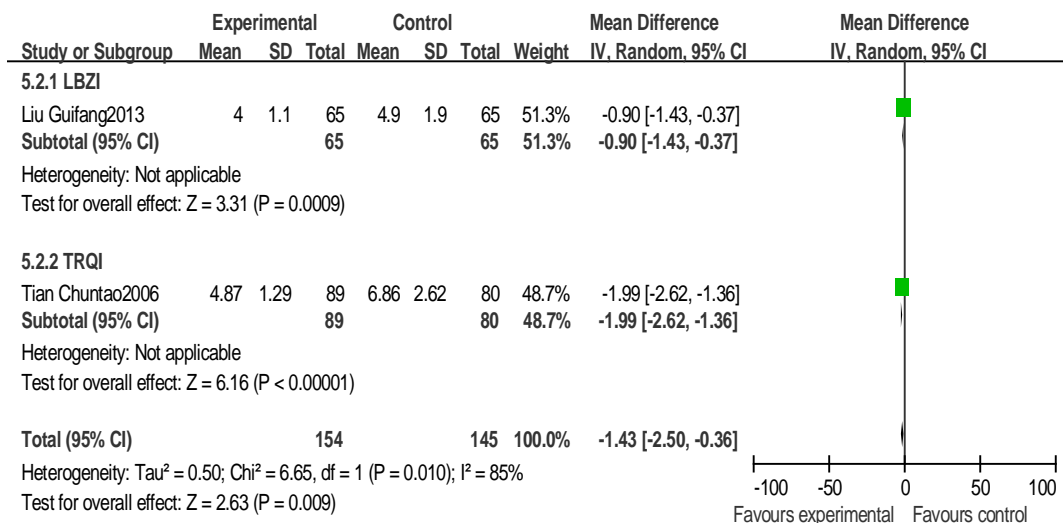

(b)

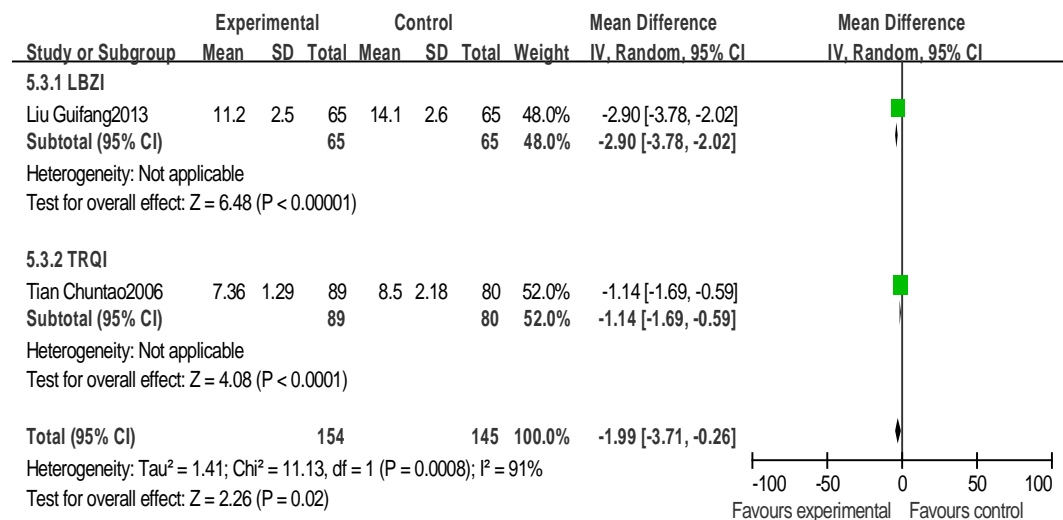

(c)

Supplementary Materials 1: Forest plot of clinical symptoms and signs  
(a) Duration of fever (b) Duration of asthma (c) Duration of colored sputum
