# Supplementary material for: Chinese Herbal Extractions for Relieving Radiation Induced Lung Injury: A Systematic Review and Meta‐Analysis
Source: Hindawi journal article supplement (doi:10.1155/2017/2141645), 2017-01-01
Supplement: f1 [file 2141645.f1.zip]

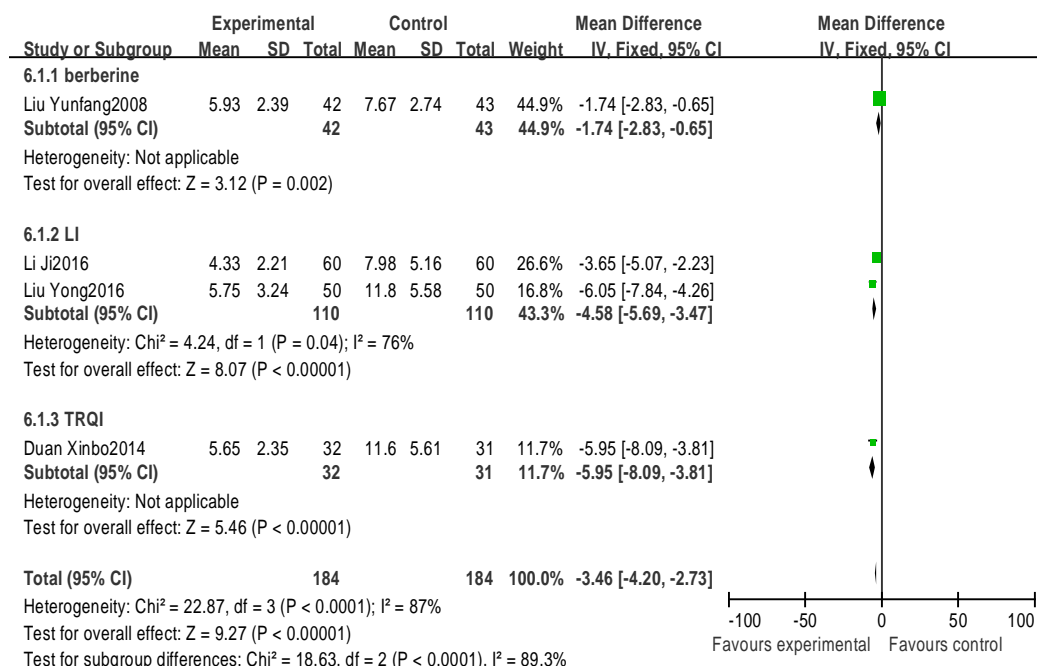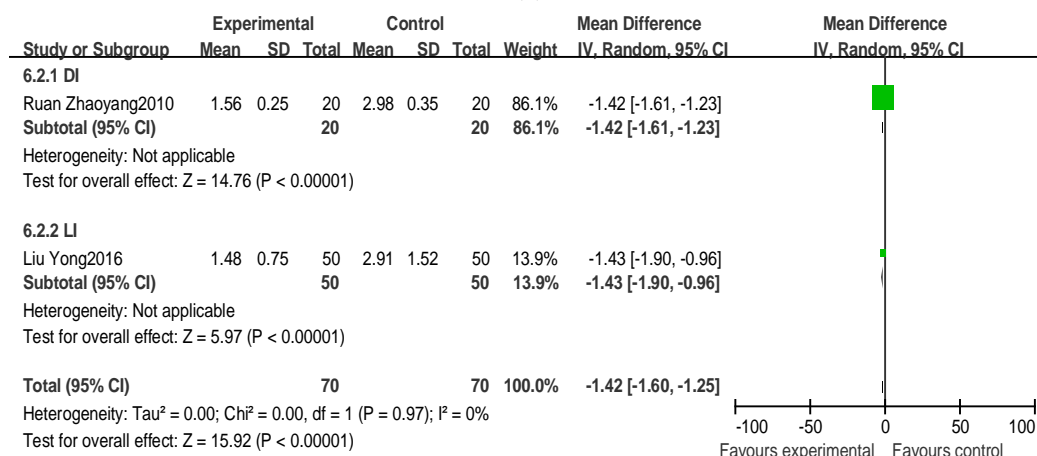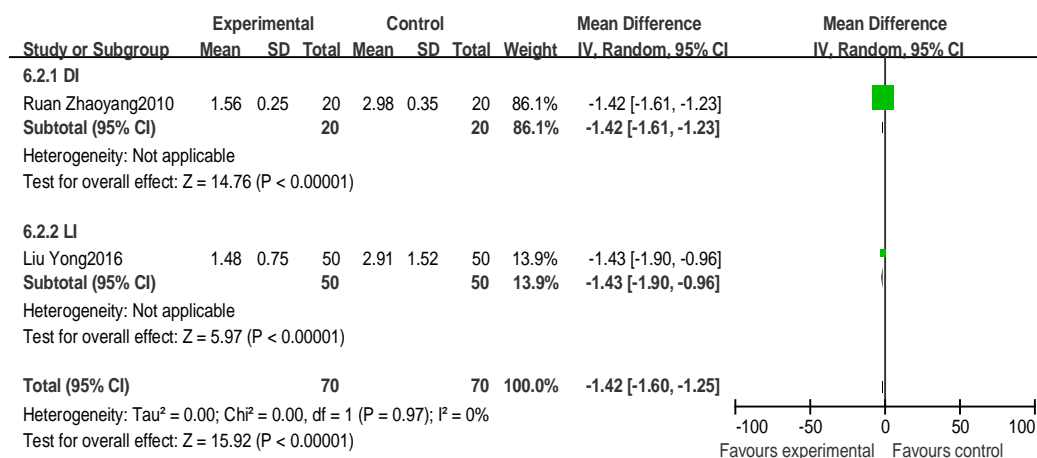

Supplementary Materials 2: Forest plot of inflammatory cytokine levels  
(a) TGF-  $\beta$  levels, (b) TNF-  $\alpha$  levels, (c) IL-6 levels
