# Supplementary material for: Chinese Herbal Extractions for Relieving Radiation Induced Lung Injury: A Systematic Review and Meta‐Analysis
Source: Hindawi journal article supplement (doi:10.1155/2017/2141645), 2017-01-01
Supplement: f1 [file 2141645.f1.zip]

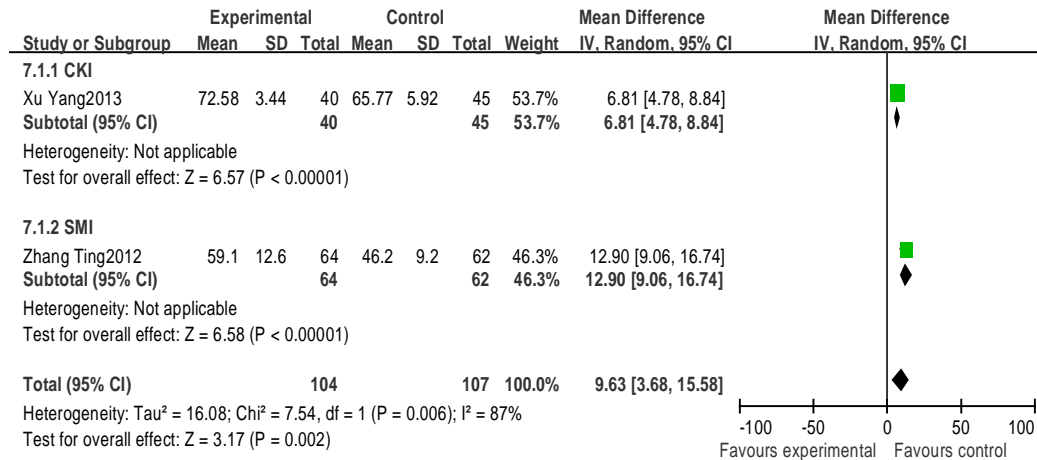

(a)

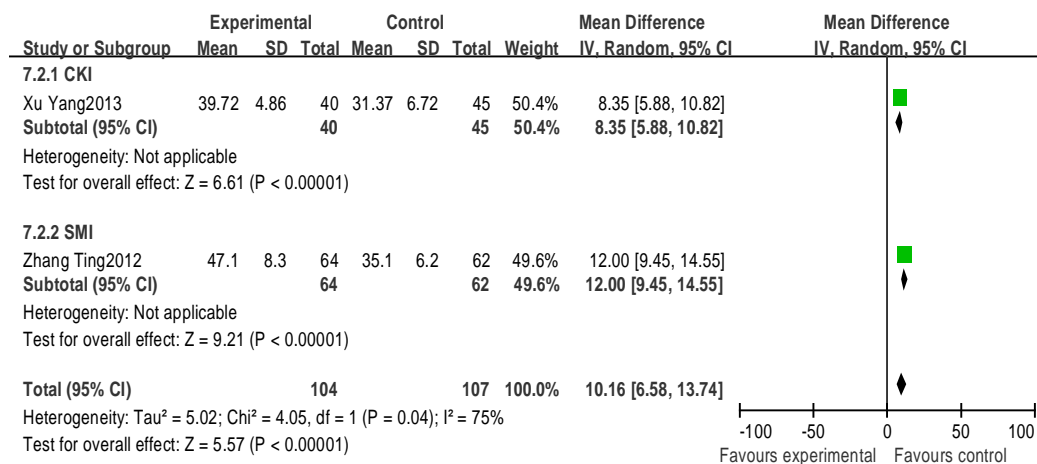

(b)

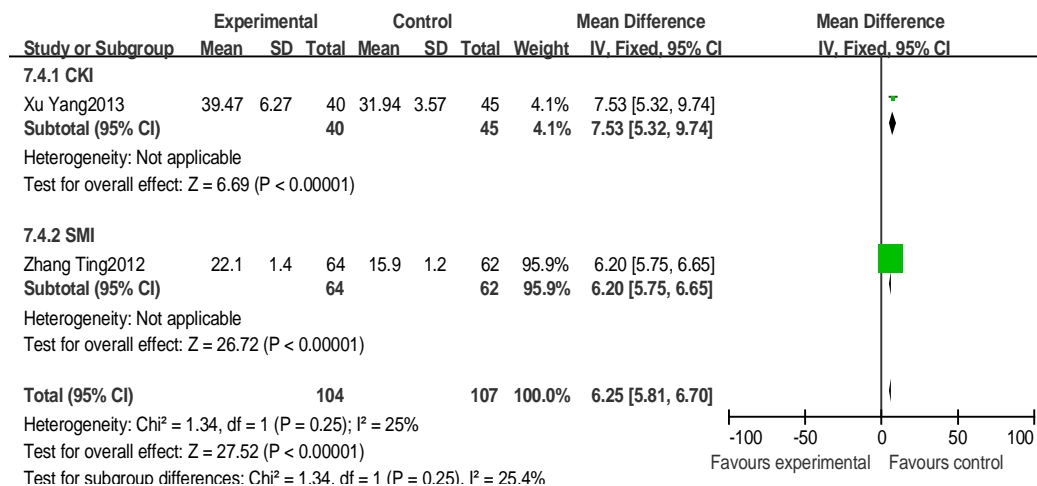

(c)

### Supplementary Materials 3: Forest plot of comparison:

(a) CD3+ thymus dependent lymphocytes levels, (b) CD4+ thymus dependent lymphocytes levels, (c) NK cell levels
